# Supplementary material
Source: PubMed Central journal article supplement (PMC1681485)
Supplement: msb4100053-s2.pdf [file msb4100053-s2.pdf]

## Supplemental Figure 2A

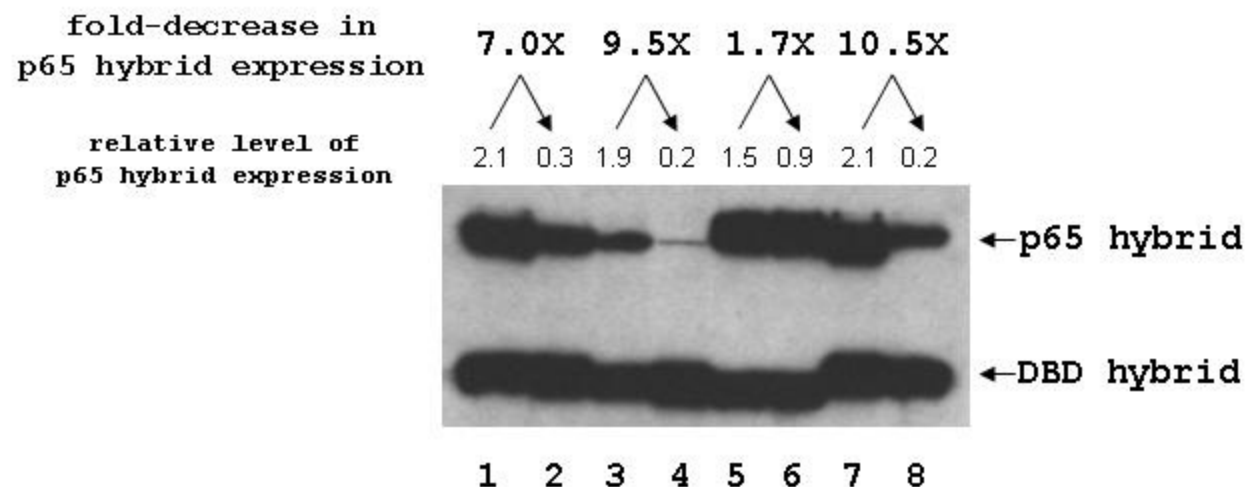

Key:

|   | <u>DBD hybrid</u> |   | <u>p65 hybrid</u> |
|---|-------------------|---|-------------------|
| 1 | Tr-Eo-Eo          | + | Eo-Eo-Hd (hi)     |
| 2 | Tr-Eo-Eo          | + | Eo-Eo-Hd (low)    |
| 3 | Hl-Eo-Eo          | + | Pe-Hd-Hd (hi)     |
| 4 | Hl-Eo-Eo          | + | Pe-Hd-Hd (low)    |
| 5 | Ik-Ik-Hd          | + | Pe-Pe-Eo (hi)     |
| 6 | Ik-Ik-Hd          | + | Pe-Pe-Eo (low)    |
| 7 | Pe-Pe-Eo          | + | Eo-Eo-Hd (hi)     |
| 8 | Pe-Pe-Eo          | + | Eo-Eo-Hd (low)    |
