# Supplementary material
Source: PubMed Central journal article supplement (PMC1681485)
Supplement: msb4100053-s5.pdf [file msb4100053-s5.pdf]

# Supplemental Figure 3B

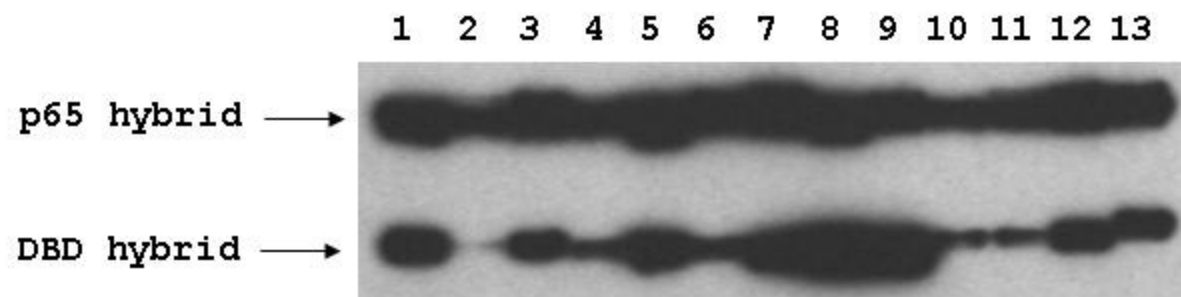

Key:

|    | <u>DBD hybrid</u> |   | <u>p65 fusion</u> |
|----|-------------------|---|-------------------|
| 1  | = Tr-Eo-Eo        | + | Eo-Eo-Hd          |
| 2  | = Tr-Eo-Eo        | + | Pe-Hd-Hd          |
| 3  | = Hl-Eo-Eo        | + | Tr-Tr-Tr          |
| 4  | = Hl-Eo-Eo        | + | Pe-Hd-Hd          |
| 5  | = Hl-Eo-Eo        | + | Eo-Eo-Hd          |
| 6  | = Hl-Eo-Eo        | + | Tr-Tr-Tr          |
| 7  | = Ik-Ik-Hd        | + | Pe-Pe-Eo          |
| 8  | = Ik-Ik-Hd        | + | Eo-Eo-Hd          |
| 9  | = Ik-Ik-Hd        | + | Tr-Tr-Tr          |
| 10 | = Pe-Pe-Eo        | + | Eo-Eo-Hd          |
| 11 | = Pe-Pe-Eo        | + | Pe-Hd-Hd          |
| 12 | = Pe-Pe-Eo        | + | Tr-Tr-Tr          |
| 13 | = Tr-Tr-Tr        | + | Tr-Tr-Tr          |
