# Supplementary material
Source: PubMed Central journal article supplement (PMC1681485)
Supplement: msb4100053-s6.pdf [file msb4100053-s6.pdf]

# Supplementary Table 1

## Zif268 hybrids

R  
N  
A  
P  
 $\alpha$   
h  
y  
b  
r  
i  
d  
s

|          | Tr-Eo-Eo          | Eo-Eo-Hd          | Pe-Hd-Hd          | Hl-Eo-Eo         | Pe-Pe-Eo          | Ik-Ik-Hd         |
|----------|-------------------|-------------------|-------------------|------------------|-------------------|------------------|
| Tr-Eo-Eo | 4.8<br>(+/- 0.4)  |                   |                   |                  |                   |                  |
| Eo-Eo-Hd | 15.1<br>(+/- 1.7) | 1.8<br>(+/- 0.1)  |                   |                  |                   |                  |
| Pe-Hd-Hd | 1.5<br>(+/- 0.2)  | 1.4<br>(+/- 0.2)  | 17.1<br>(+/- 1.5) |                  |                   |                  |
| Hl-Eo-Eo | 0.9<br>(+/- 0.1)  | 1.1<br>(+/- 0.2)  | 16.3<br>(+/- 0.8) | 1.4<br>(+/- 0.2) |                   |                  |
| Pe-Pe-Eo | 4.6<br>(+/- 1.2)  | 19.2<br>(+/- 1.6) | 2.5<br>(+/- 0.5)  | 2.8<br>(+/- 0.4) | 9.6<br>(+/- 0.3)  |                  |
| Ik-Ik-Hd | 9.5<br>(+/- 1.4)  | 1.6<br>(+/- 0.2)  | 2.4<br>(+/- 0.4)  | 1.3<br>(+/- 0.3) | 20.7<br>(+/- 0.9) | 1.7<br>(+/- 0.0) |
