# Supplementary material
Source: PubMed Central journal article supplement (PMC1681485)
Supplement: msb4100053-s7.pdf [file msb4100053-s7.pdf]

## Supplementary Table 2

|                                           | Theoretical number of potential DZFs in each library | Actual number of transformants for each library | Theoretical number of combinations tested in each library x library selection | Actual number of combinations tested in each library x library selection |
|-------------------------------------------|------------------------------------------------------|-------------------------------------------------|-------------------------------------------------------------------------------|--------------------------------------------------------------------------|
| Set/Group A:<br>Ik, Eo, Pe, Hd,<br>Hl, Hh | 30                                                   | $10^3-10^4$                                     | 900                                                                           | $\sim 10^6$                                                              |
| Set/Group B:<br>Pe, Hd, Hl                | 6                                                    | $10^4-10^5$                                     | 36                                                                            | $\sim 5 \times 10^6$                                                     |
| Set/Group C:<br>Eo, Tr, Hl, Hh,<br>Hc     | 20                                                   | $10^3-10^4$                                     | 400                                                                           | $\sim 10^6$                                                              |
