# Supplementary material
Source: PubMed Central journal article supplement (PMC1681485)

# Supplementary Figure 1

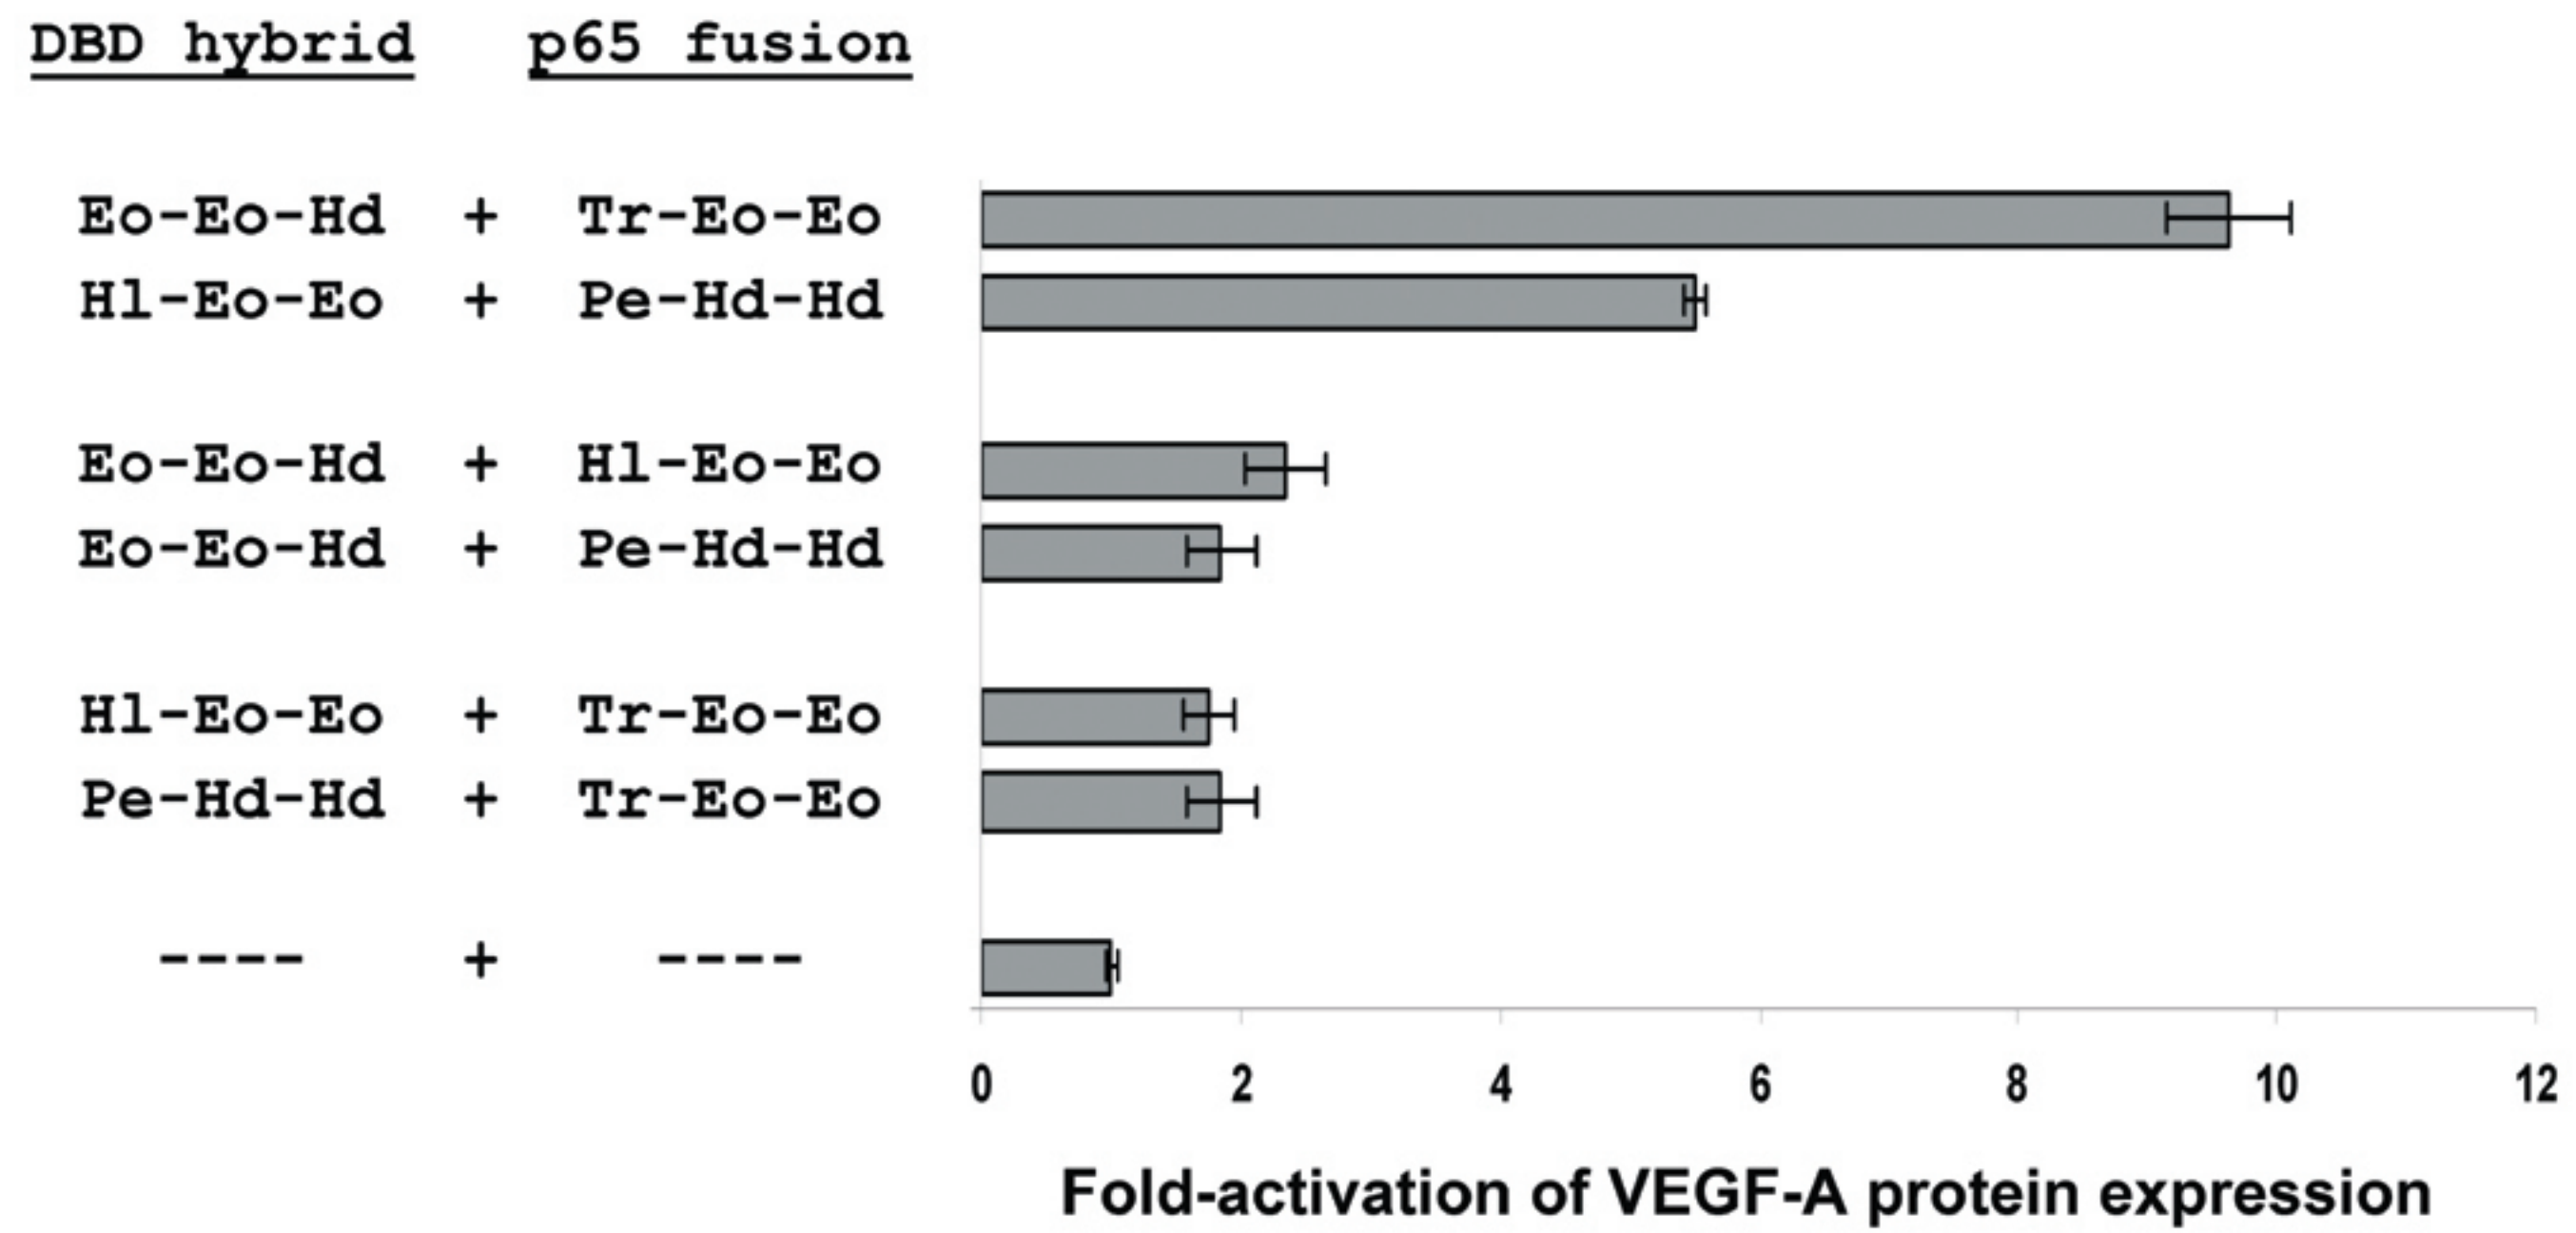

Supplement: msb4100053-s1.pdf [file msb4100053-s1.pdf]

## Supplemental Figure 2B

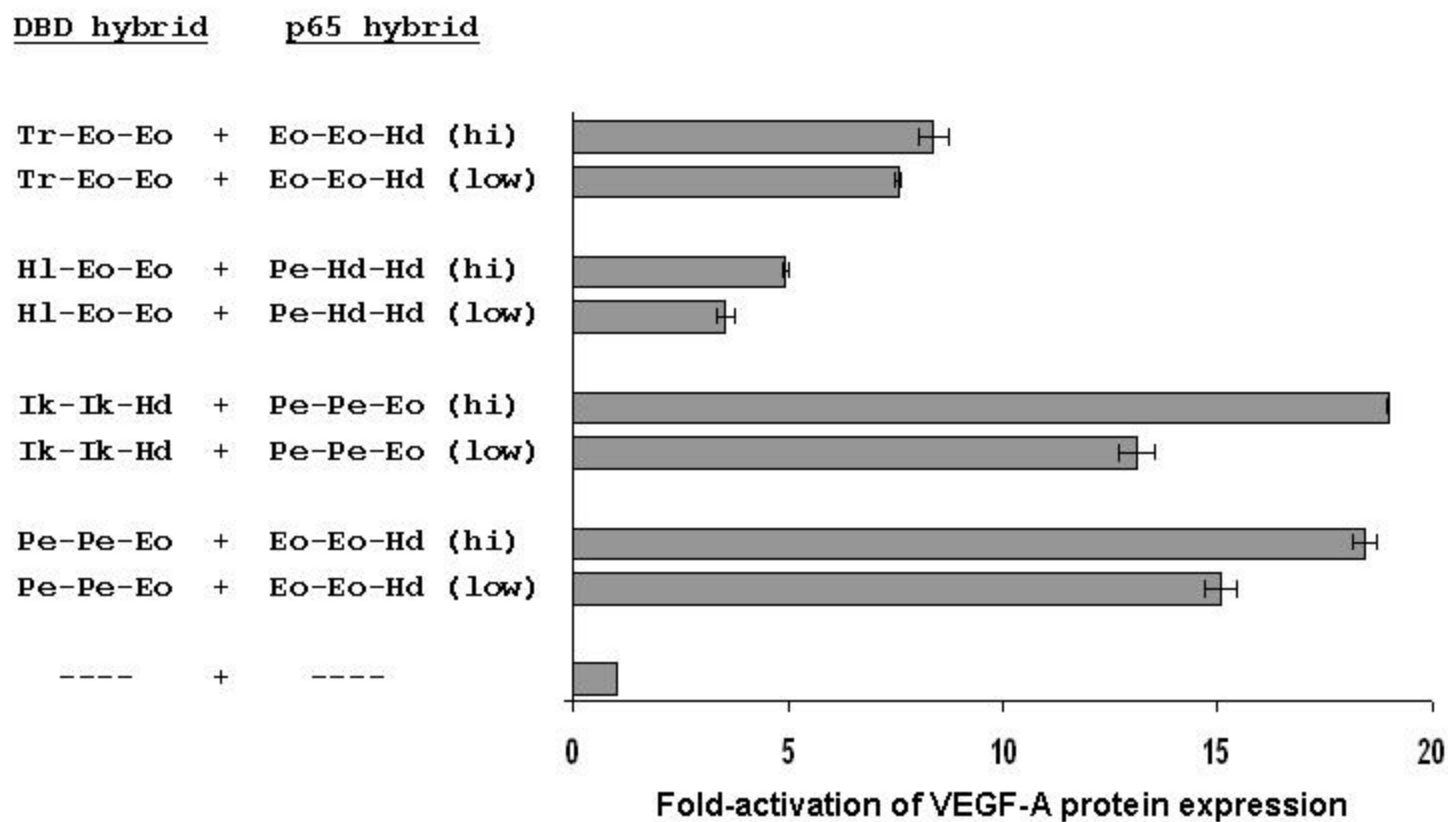

Supplement: msb4100053-s3.pdf [file msb4100053-s3.pdf]

# Supplemental Figure 3A

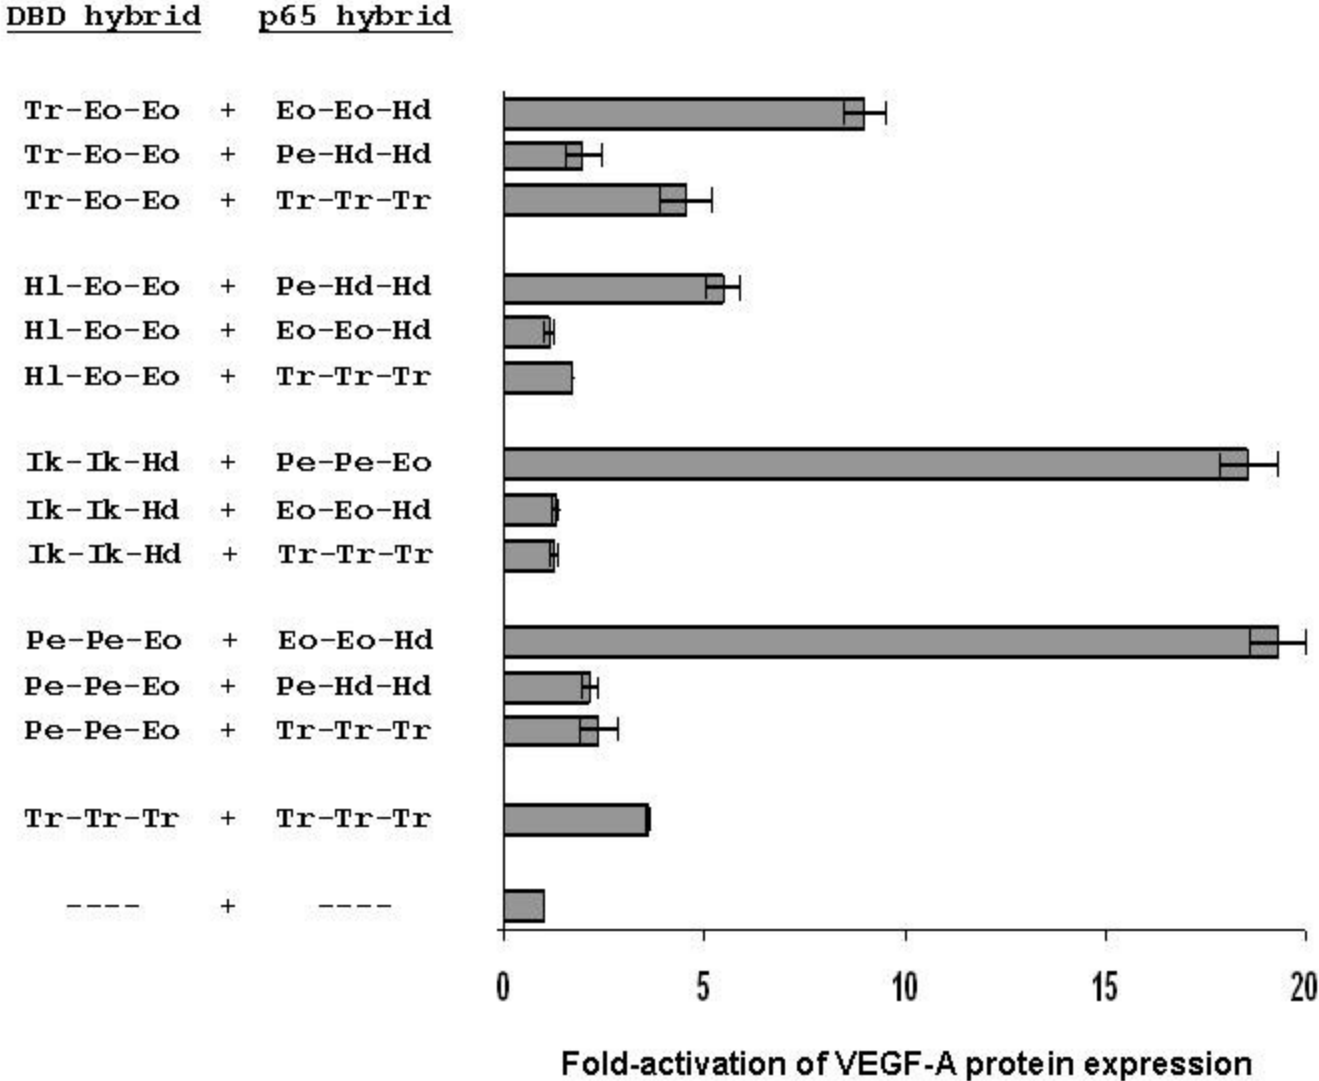

Supplement: msb4100053-s4.pdf [file msb4100053-s4.pdf]
